# Supplementary material for: Stiffness-Modulation of Collagen Gels by Genipin-Crosslinking for Cell Culture
Source: MDPI journal article supplement (doi:10.3390/gels9020148), 2023-02-10
Supplement: s1 [file s1]

H1299

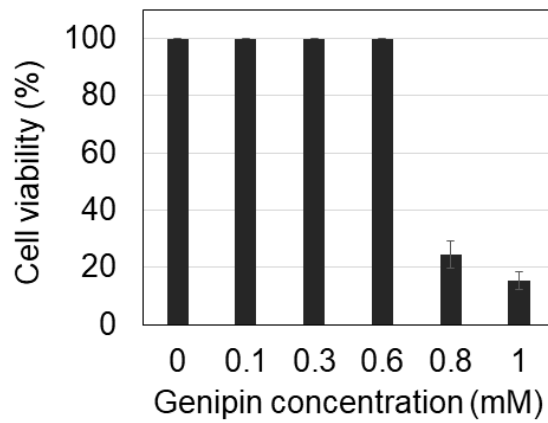

Mesenchymal stromal cells

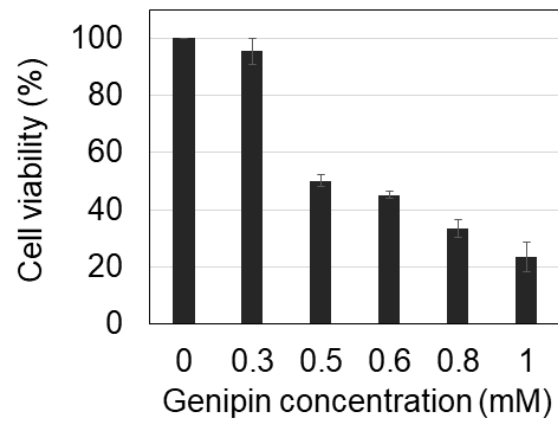

**Figure S1.** Cell viability of H1299 and mouse mesenchymal stromal cells. Mean $\pm$ S.E.  $N = 3$  independent experiments.

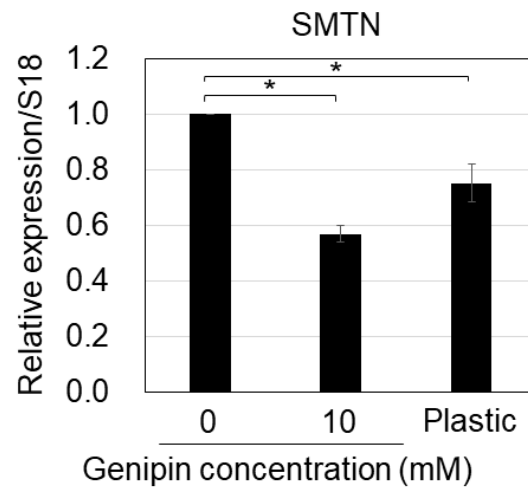

**Figure S2.** qPCR of SMTN in mouse mesenchymal stromal cells on 0 or 10 mM genipin-mixed collagen gels or collagen-coated plastic substrates with smooth muscle-differentiation condition. S18 was used as an internal control. Mean $\pm$ S.D.  $N = 3$  independent experiments. \*Statistical significance was determined using a 95% confidence interval with Bonferroni correction.

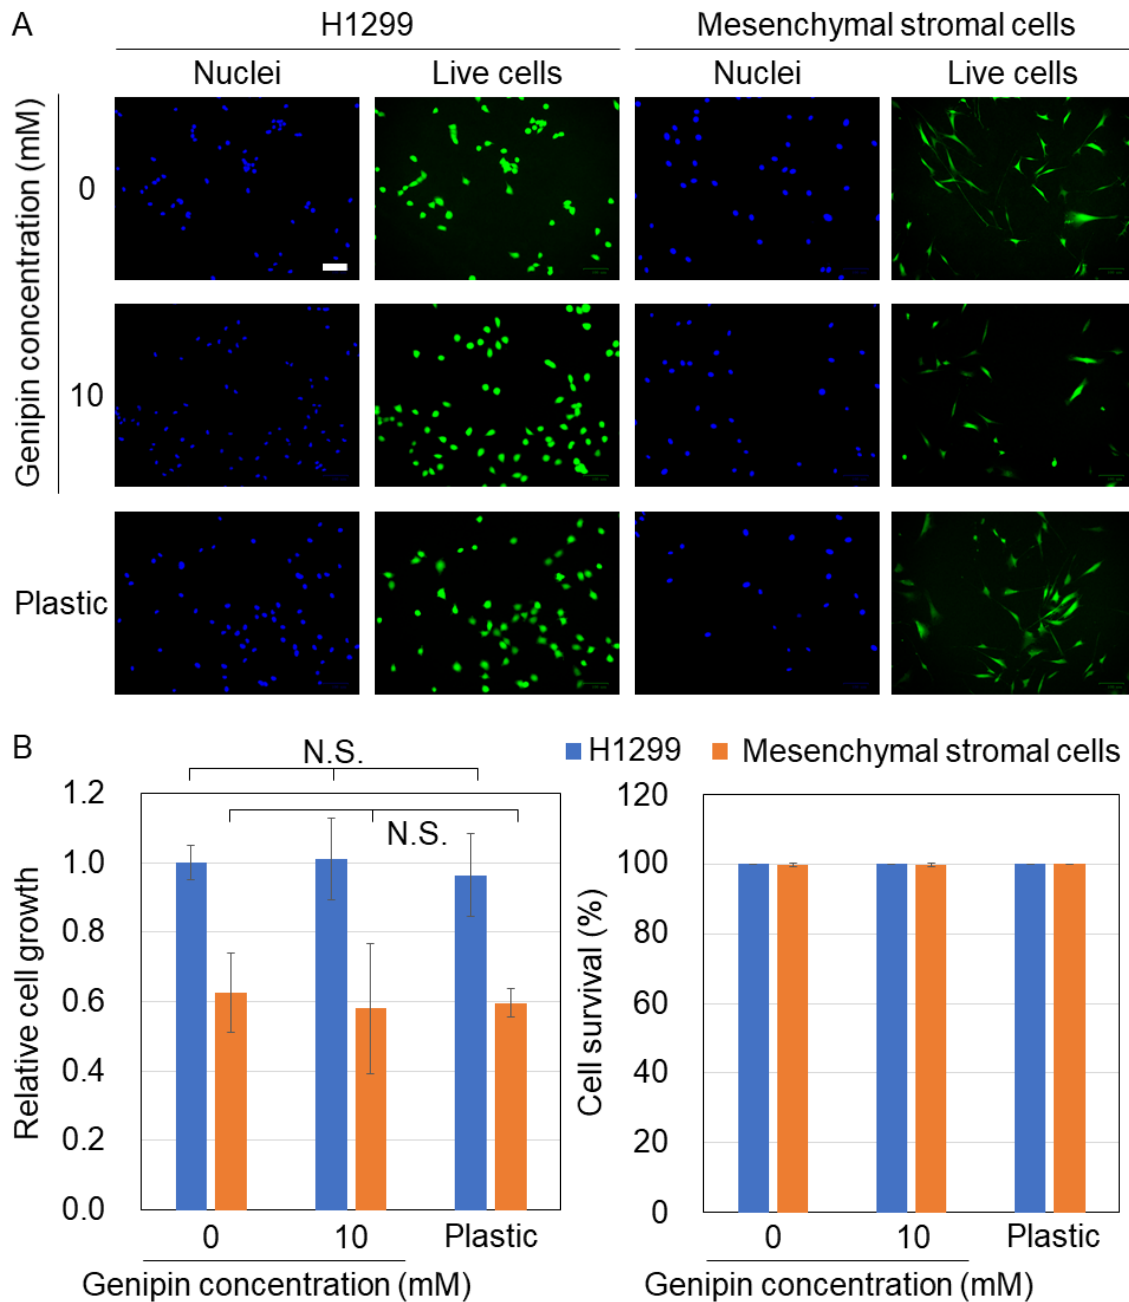

**Figure S3.** (A) Fluorescent staining of nuclei and live H1299 and mouse mesenchymal stromal cells on the 0 or 10 mM genipin-mixed collagen gels or collagen-coated plastic substrates. Scale bar = 100  $\mu$ m. (B) Relative cell growth and survival of H1299 and mouse mesenchymal stromal cells in (A). Mean $\pm$ S.D.  $N$  = 3 independent experiments. N.S.; no statistical significance with Welch's  $t$ -test (mesenchymal stromal cells, 10 mM vs plastic) or Student's  $t$ -test (the others) with Bonferroni correction.
